# Supplementary material for: Dual crosslinked PMMA/BaTiO3 polymer nanocomposite dielectrics for flexible film capacitors
Source: Royal Society of Chemistry journal article supplement (doi:10.1039/d2nj05673a), 2022-12-27
Supplement: d2nj05673a1.pdf [file d2nj05673a1.pdf]

Electronic Supplementary Material (ESI) for New Journal of Chemistry.

Electronnic supporting Information for:

## Dual Crosslinked PMMA/BaTiO<sub>3</sub> Polymer Nanocomposite Dielectrics for Flexible Film Capacitors

Yulei Zhang<sup>a,b</sup>, Kun Zhang<sup>a,b</sup>, Xiaoya Hou<sup>\*a,b</sup>, Lei Liu<sup>c</sup> and Jie Zhang<sup>a,b</sup>

<sup>a</sup>School of Mechanical Engineering, Jiangnan University, No.1800, Lihu Avenue, Wuxi City, Jiangsu 214122, P.R. China.

<sup>b</sup>Jiangsu Key Laboratory of Advanced Food Manufacturing Equipment and Technology (Jiangnan University).

<sup>c</sup>China Center for Modernization Research, Chinese Academy of Sciences.

\*Corresponding author: xiaoyahou@jiangnan.edu.cn

### 1. GPC results

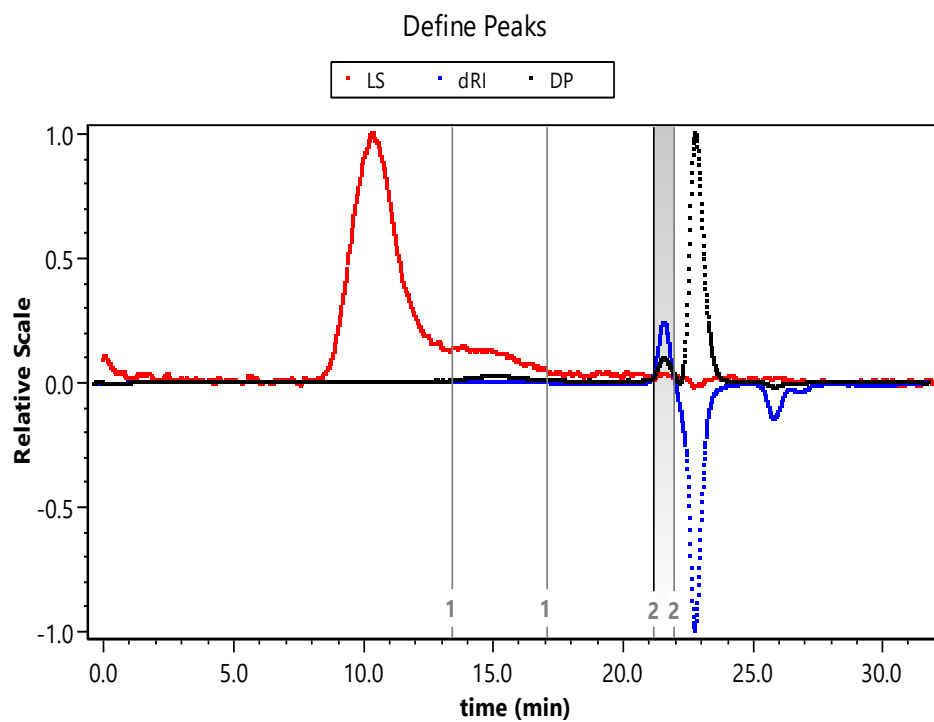

Figure S1. GPC of PMMA-BT(8 wt%)

File Name: Experiment16  
Collection Operator: JiangNanUni-PC\JiangNan Uni (JiangNanUni-PC\JiangNan Uni (JiangNan Uni))  
Processing Operator: JiangNanUni-PC\JiangNan Uni (JiangNan Uni)

Sample: untitled

Configuration

Notes:

Concentration Source: RI  
Flow Rate: 1.000 mL/min

Light Scattering Instrument: HELEOS  
Cell Type: Fused Silica  
Wavelength: 664.0 nm  
Calibration Constant: 3.1929×10<sup>-5</sup> 1/(V cm)

RI Instrument: rEX

Viscometer: ViscoStar  
Dilution Factor: 0.4994

Solvent: DMF  
Temperature Correction Enabled: no  
Refractive Index: 1.431

Results

| Peak Results                                                   |                                  |                                  |
|----------------------------------------------------------------|----------------------------------|----------------------------------|
|                                                                | Peak 1                           | Peak 2                           |
| Hydrodynamic radius (v) moments (nm)                           |                                  |                                  |
| Rh(v)n                                                         | 13.245 (±2.477%)                 | 0.767 (±6.290%)                  |
| Rh(v)w                                                         | 14.725 (±2.950%)                 | 0.803 (±6.528%)                  |
| Rh(v)z                                                         | 21.537 (±6.357%)                 | 0.864 (±6.884%)                  |
| Masses                                                         |                                  |                                  |
| Calculated Mass (µg)                                           | 2.65                             | 127.42                           |
| Mass Recovery (%)                                              | n/a                              | n/a                              |
| Mass Fraction (%)                                              | 2.0                              | 98.0                             |
| Molar mass moments (g/mol)                                     |                                  |                                  |
| Mn                                                             | 3.552×10 <sup>5</sup> (±6.027%)  | 1.402×10 <sup>3</sup> (±18.583%) |
| Mp                                                             | 2.561×10 <sup>5</sup> (±5.875%)  | 1.202×10 <sup>3</sup> (±16.221%) |
| Mv                                                             | 4.092×10 <sup>5</sup> (±1.106%)  | 1.510×10 <sup>3</sup> (±2.915%)  |
| Mw                                                             | 4.452×10 <sup>5</sup> (±5.999%)  | 1.554×10 <sup>3</sup> (±19.951%) |
| Mz                                                             | 8.669×10 <sup>5</sup> (±13.121%) | 1.810×10 <sup>3</sup> (±46.645%) |
| Polydispersity                                                 |                                  |                                  |
| Mw/Mn                                                          | 1.253 (±8.504%)                  | 1.109 (±27.265%)                 |
| Mz/Mn                                                          | 2.441 (±14.439%)                 | 1.292 (±50.210%)                 |
| rms radius moments (nm)                                        |                                  |                                  |
| Rn                                                             | 15.7 (±75.6%)                    | n/a                              |
| Rw                                                             | 16.7 (±67.1%)                    | n/a                              |
| Rz                                                             | 17.3 (±62.7%)                    | n/a                              |
| Intrinsic viscosity moments (mL/g)                             |                                  |                                  |
| [η]n                                                           | 42.745 (±4.350%)                 | 2.076 (±0.898%)                  |
| [η]w                                                           | 50.16 (±6.97%)                   | 2.17 (±1.01%)                    |
| [η]z                                                           | 91.035 (±22.678%)                | 2.337 (±1.165%)                  |
| Mark-Houwink-Sakurada a: 0.545 (±0.134%)                       |                                  |                                  |
| Mark-Houwink-Sakurada K: 4.057×10 <sup>-2</sup> (±0.588%) mL/g |                                  |                                  |

## Results

### Peak Results

|                                             | Peak 1                                 | Peak 2                                 |
|---------------------------------------------|----------------------------------------|----------------------------------------|
| <b>Hydrodynamic radius (v) moments (nm)</b> |                                        |                                        |
| Rh(v)n                                      | 13.245 ( $\pm 2.477\%$ )               | 0.767 ( $\pm 6.290\%$ )                |
| Rh(v)w                                      | 14.725 ( $\pm 2.950\%$ )               | 0.803 ( $\pm 6.528\%$ )                |
| Rh(v)z                                      | 21.537 ( $\pm 6.357\%$ )               | 0.864 ( $\pm 6.884\%$ )                |
| <b>Masses</b>                               |                                        |                                        |
| Calculated Mass ( $\mu\text{g}$ )           | 2.65                                   | 127.42                                 |
| Mass Recovery (%)                           | n/a                                    | n/a                                    |
| Mass Fraction (%)                           | 2.0                                    | 98.0                                   |
| <b>Molar mass moments (g/mol)</b>           |                                        |                                        |
| Mn                                          | $3.552 \times 10^5$ ( $\pm 6.027\%$ )  | $1.402 \times 10^3$ ( $\pm 18.583\%$ ) |
| Mp                                          | $2.561 \times 10^5$ ( $\pm 5.875\%$ )  | $1.202 \times 10^3$ ( $\pm 16.221\%$ ) |
| Mv                                          | $4.092 \times 10^5$ ( $\pm 1.106\%$ )  | $1.510 \times 10^3$ ( $\pm 2.915\%$ )  |
| Mw                                          | $4.452 \times 10^5$ ( $\pm 5.999\%$ )  | $1.554 \times 10^3$ ( $\pm 19.951\%$ ) |
| Mz                                          | $8.669 \times 10^5$ ( $\pm 13.121\%$ ) | $1.810 \times 10^3$ ( $\pm 46.645\%$ ) |
| <b>Polydispersity</b>                       |                                        |                                        |
| Mw/Mn                                       | 1.253 ( $\pm 8.504\%$ )                | 1.109 ( $\pm 27.265\%$ )               |
| Mz/Mn                                       | 2.441 ( $\pm 14.439\%$ )               | 1.292 ( $\pm 50.210\%$ )               |
| <b>rms radius moments (nm)</b>              |                                        |                                        |
| Rn                                          | 15.7 ( $\pm 75.6\%$ )                  | n/a                                    |
| Rw                                          | 16.7 ( $\pm 67.1\%$ )                  | n/a                                    |
| Rz                                          | 17.3 ( $\pm 62.7\%$ )                  | n/a                                    |
| <b>Intrinsic viscosity moments (mL/g)</b>   |                                        |                                        |
| $[\eta]_n$                                  | 42.745 ( $\pm 4.350\%$ )               | 2.076 ( $\pm 0.898\%$ )                |
| $[\eta]_w$                                  | 50.16 ( $\pm 6.97\%$ )                 | 2.17 ( $\pm 1.01\%$ )                  |
| $[\eta]_z$                                  | 91.035 ( $\pm 22.678\%$ )              | 2.337 ( $\pm 1.165\%$ )                |

Mark-Houwink-Sakurada a: 0.545 ( $\pm 0.134\%$ )

Mark-Houwink-Sakurada K:  $4.057 \times 10^{-2}$  ( $\pm 0.588\%$ ) mL/g

## 2. NMR

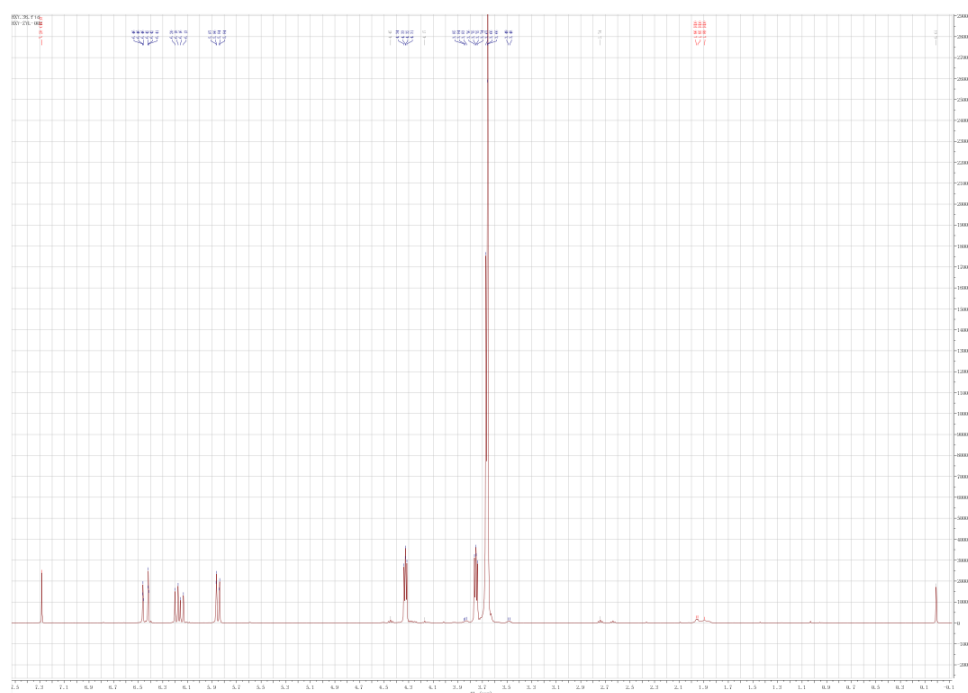

**Figure S2. NMR of Phosphate**

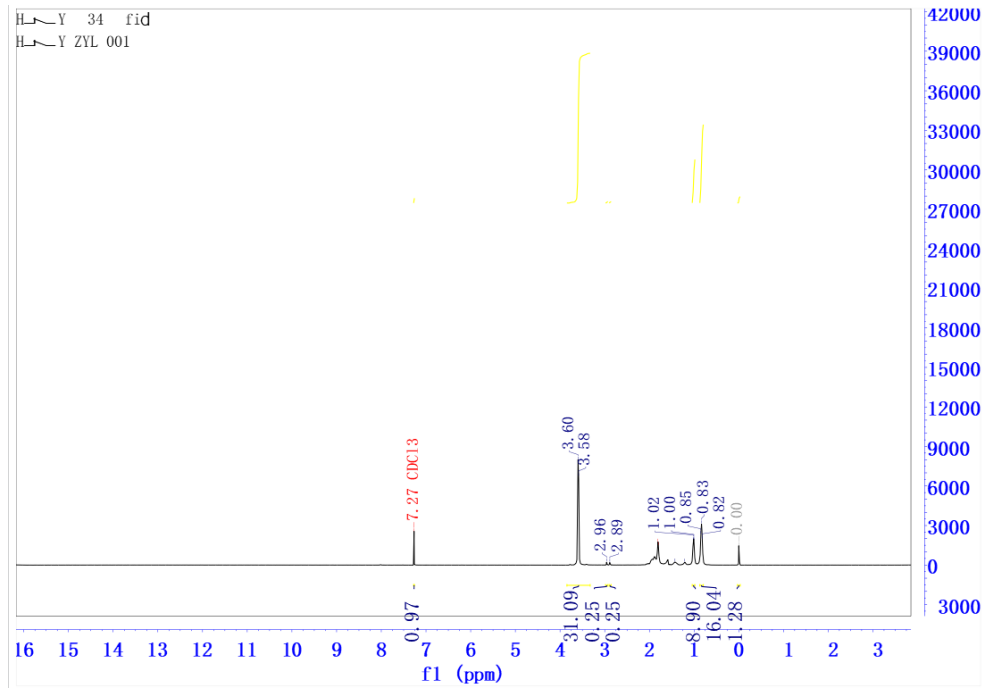

**Figure S3. NMR of PMMA-BT(8 wt%)**

### 3. Calculation of m-BT vol%

m-BT vol% was calculated by formula (1):

$$m - BT \text{ vol\%} = \frac{V_{m-BT}}{V_{PMMA-BT}} \times 100\% \quad (1)$$

where  $\rho_{PMMA}$ ,  $\rho_P$  and  $\rho_{BT}$  were the densities of PMMA, the phosphate and BT, which are equal to 1.17g/cm<sup>3</sup>, 1.387g/cm<sup>3</sup> and 6.017g/cm<sup>3</sup>, respectively.

### 4. Dielectric constant and dielectric loss

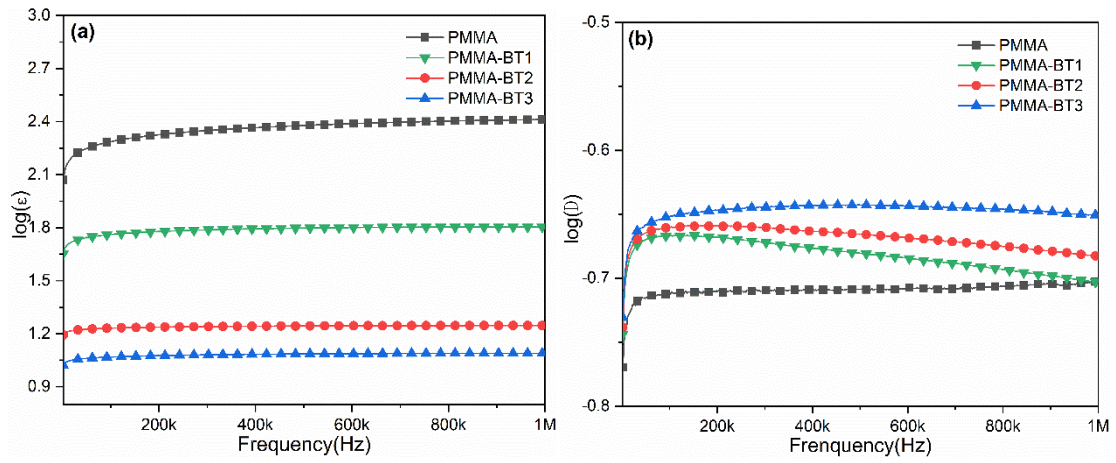

**Figure S4.** The logarithm of dielectric constant (a) and dielectric loss (b) of Pure PMMA and PMMA-BT film with frequency from 1 KHz to 1 MHz.

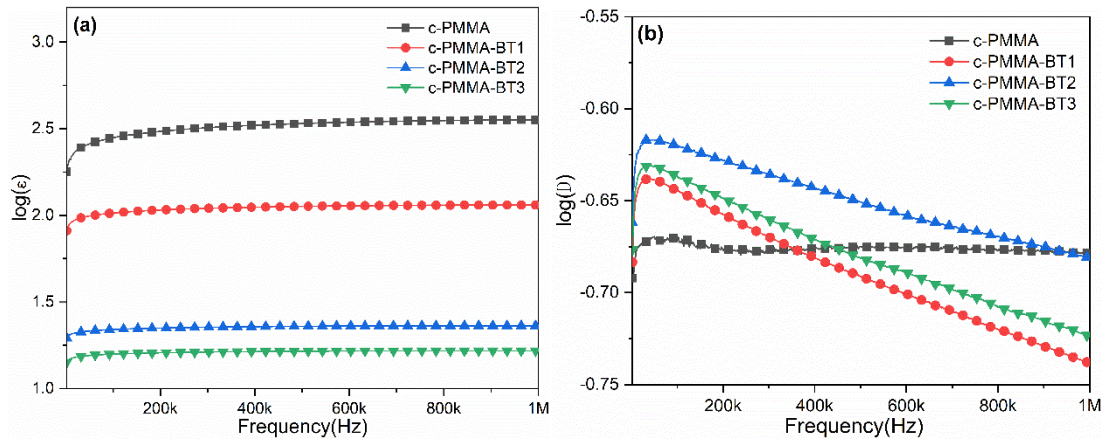

**Figure S5.** The logarithm of dielectric constant (a) and dielectric loss, (b) of c-PMMA and c-PMMA-BT film with frequency from 1 KHz to 1 MHz.
